# Supplementary material for: Structural Insights into the Substrate Transport Mechanisms in GTR Transporters through Ensemble Docking
Source: MDPI journal article supplement (doi:10.3390/ijms23031595), 2022-01-29
Supplement: s1 [file s1]

Structural insights into the substrate transport mechanisms in GTR transporters through ensemble docking.

Supplementary data

Supplementary Figures

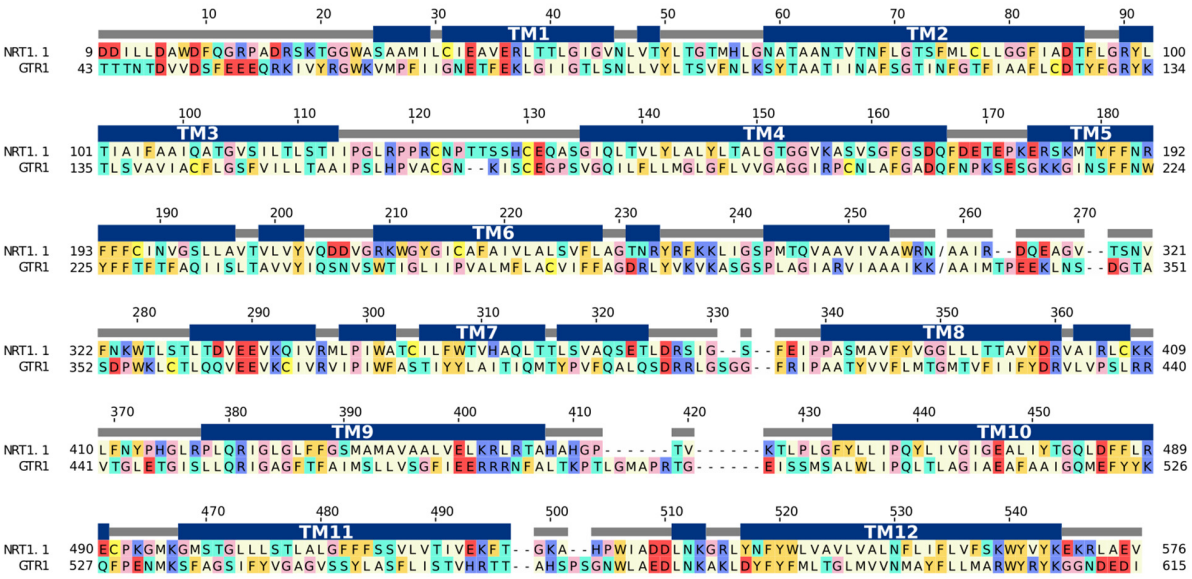

**Figure S1: Sequence alignment between NRT1.1 and GTR1 used for modeling.** The alignment is colored according to the chemical properties of the residues: light yellow, aliphatic (A, I, L, M, and V); cyan, polar uncharged (N, Q, S, and T); orange, aromatic (F, W, and Y); red, acidic (D and E); purple, basic (K, R, and H); pink, exceptional (G and P), and yellow (C). The secondary structure (helix) assignment for the NRT1.1 crystal structure was obtained with DSSP and is indicated by dark blue rectangles. The sequence identity between NRT1.1 and GTR1 is 30.3%.

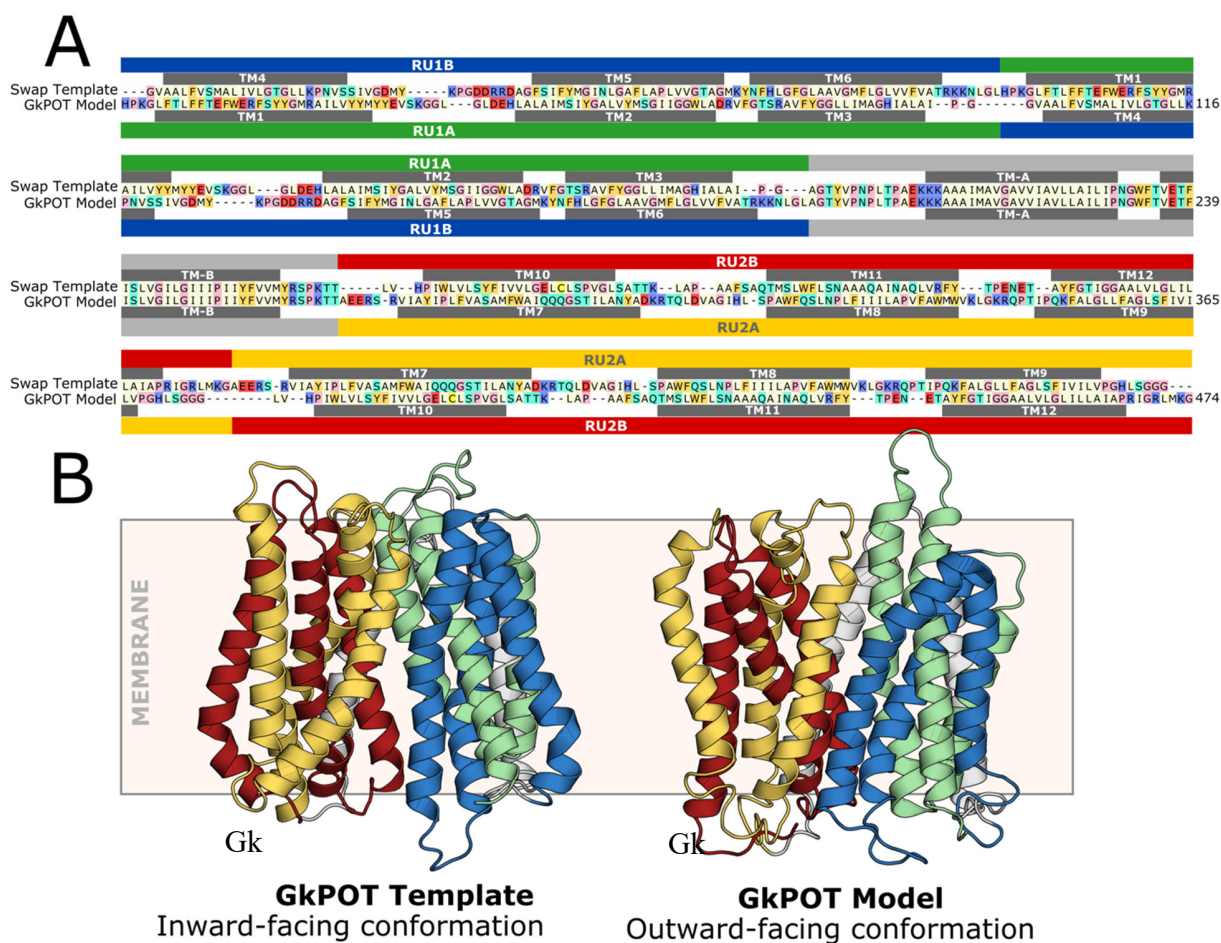

**Figure S2: Repeat-swap modeling of GkPOT in an outward-facing conformation.** (A) Refined sequence alignment between the GkPOT and swapped-template sequences. The sequence alignment is colored according to the chemical properties of the residues. The secondary structure (helix) assignment is indicated by dark grey rectangles and labeled by TM segments. The sequence range of each repeat is displayed with colored bars above and under the template and target sequences. The region comprising RU1A, RU1B, RU2A and RU2B are colored in green, blue, yellow, and red, respectively. (B) The GkPOT structure in an inward-facing conformation (left) is compared with the repeat-swapped model in an outward-facing conformation (right). Structures are viewed along the plane of the membrane, with the extracellular side at the top.

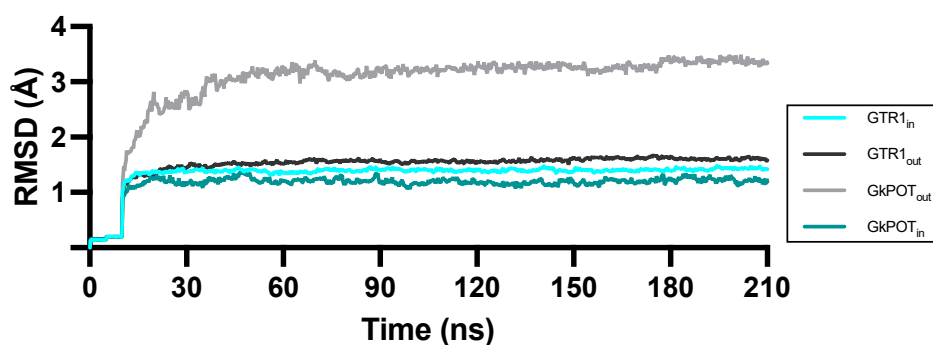

**Figure S3. RMSD for GTR1 and GkPOT atoms during the MDs.** A restraint spring constant of 20, 10 and 1  $\text{kcal} \times \text{mol}^{-1} \times \text{\AA}^{-2}$  was applied between 0-5 ns, 5-10 ns, and 10-210 ns, respectively.

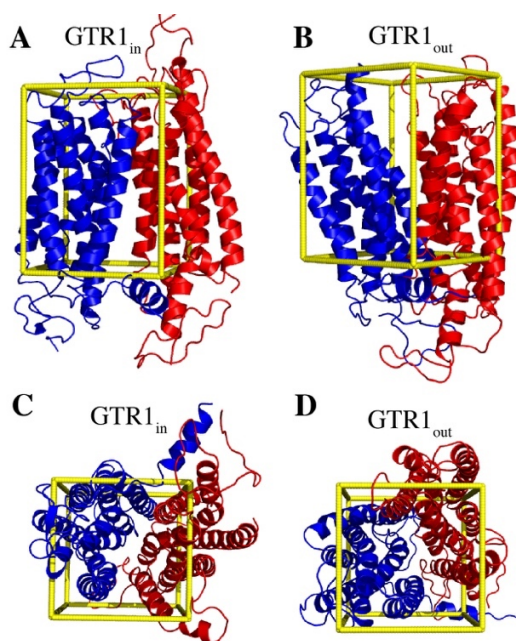

**Figure S4. Grid box used in ensemble docking.** GTR1<sub>in</sub> (A, C) and GTR1<sub>out</sub> (B-D) models with grid boxes represented as yellow lines. (A-B) Side-view representation. (C) Bottom-view representation. (D) Up-view representation. Residues lining the central cavity are always contained by the grid box. The outer box edge of all grid boxes used is  $(32_x \times 32_y \times 42_z) \text{\AA}^3$ .

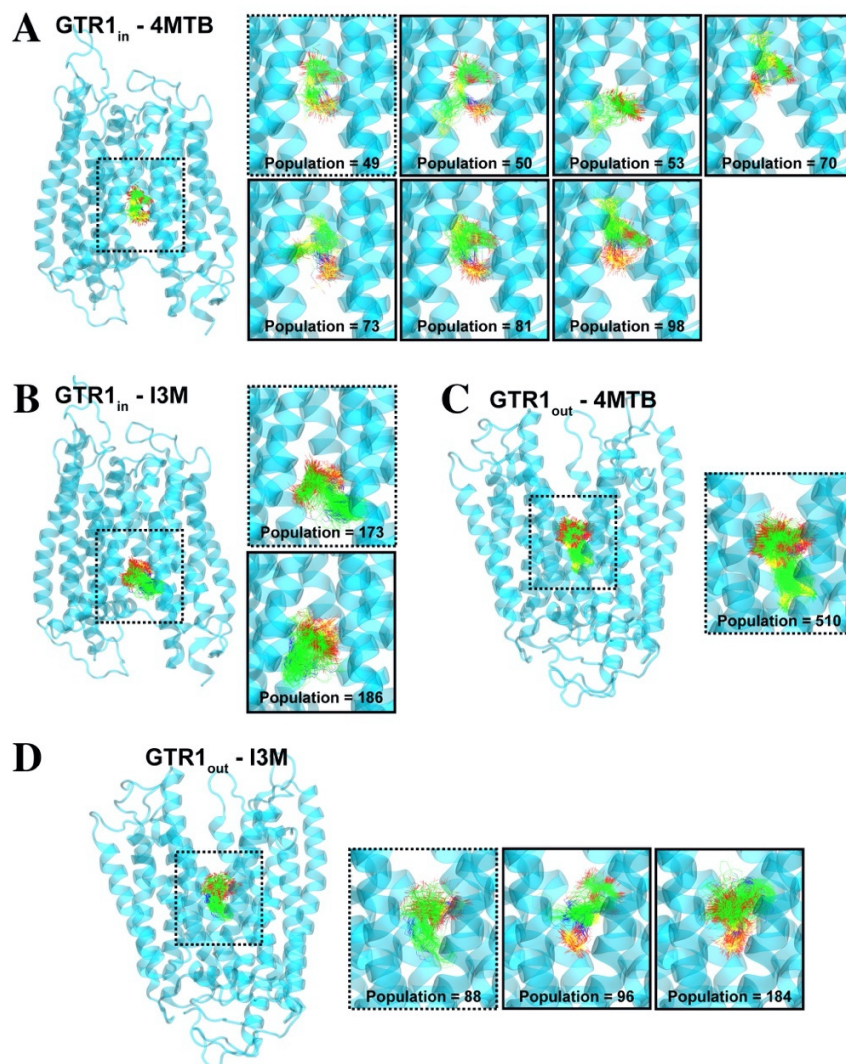

**Figure S5. Ensemble docking of glucosinolates into GTR1.** Significant clusters of 4MTB (A, C) and I3M (B, D) conformers from ensemble docking into GTR1 in both inward and outward conformations.

## Supplementary Tables

**Table S1.** Clusters population obtained from ensemble docking of glucosinolates into GTR1.

| GTR1 <sub>in</sub> - 4MTB | GTR1 <sub>out</sub> - 4MTB | GTR1 <sub>in</sub> - I3M | GTR1 <sub>out</sub> - I3M |
|---------------------------|----------------------------|--------------------------|---------------------------|
| 98                        | 510                        | 186                      | 184                       |
| 81                        | 81                         | 173                      | 96                        |
| 73                        | 42                         | 61                       | 88                        |
| 70                        | 34                         | 54                       | 57                        |
| 53                        | 27                         | 53                       | 54                        |
| 50                        | 21                         | 42                       | 47                        |
| 49                        | 19                         | 36                       | 30                        |
| 40                        | 17                         | 34                       | 29                        |
| 35                        | 17                         | 33                       | 21                        |
| 34                        | 16                         | 32                       | 20                        |
| 31                        | 15                         | 25                       | 20                        |
| 27                        | 14                         | 21                       | 19                        |
| 20                        | 13                         | 16                       | 17                        |
| 17                        | 8                          | 16                       | 17                        |
| 15                        | 8                          | 15                       | 14                        |
| 14                        | 7                          | 14                       | 13                        |
| 13                        | 7                          | 13                       | 13                        |
| 12                        | 6                          | 13                       | 12                        |
| 11                        | 6                          | 13                       | 11                        |
| 10                        | 6                          | 11                       | 10                        |
| 9                         | 6                          | 11                       | 10                        |
| 9                         | 5                          | 11                       | 10                        |
| 8                         | 5                          | 7                        | 8                         |
| 8                         | 5                          | 7                        | 8                         |
| 7                         | 5                          | 7                        | 8                         |
| 7                         | 5                          | 6                        | 7                         |
| 7                         | 4                          | 5                        | 6                         |
| 7                         | 4                          | 5                        | 6                         |
| 6                         | 4                          | 5                        | 6                         |
| 6                         | 3                          | 3                        | 6                         |
| 6                         | 3                          | 3                        | 5                         |
| 6                         | 3                          | 3                        | 5                         |
| 6                         | 3                          | 3                        | 5                         |
| 6                         | 3                          | 3                        | 5                         |
| 6                         | 3                          | 2                        | 5                         |
| 5                         | 3                          | 2                        | 5                         |
| 5                         | 3                          | 2                        | 5                         |

[illegible]

|                                         |        |        |        |        |
|-----------------------------------------|--------|--------|--------|--------|
|                                         | 1      |        |        | 1      |
|                                         | 1      |        |        | 1      |
|                                         | 1      |        |        | 1      |
|                                         | 1      |        |        | 1      |
|                                         | 1      |        |        | 1      |
|                                         | 1      |        |        | 1      |
|                                         | 1      |        |        | 1      |
|                                         | 1      |        |        | 1      |
|                                         | 1      |        |        | 1      |
|                                         | 1      |        |        | 1      |
|                                         | 1      |        |        | 1      |
|                                         | 1      |        |        | 1      |
|                                         | 1      |        |        | 1      |
|                                         | 1      |        |        | 1      |
|                                         | 1      |        |        | 1      |
|                                         | 1      |        |        | 1      |
|                                         | 1      |        |        | 1      |
|                                         | 1      |        |        | 1      |
|                                         | 1      |        |        | 1      |
|                                         | 1      |        |        | 1      |
| Total pop                               | 986    | 979    | 965    | 993    |
| Average pop                             | 10.60  | 15.54  | 18.21  | 10.45  |
| SD pop                                  | 18.67  | 64.51  | 35.61  | 24.11  |
| Sig Cluster threshold                   | 47.95  | 144.56 | 89.43  | 58.68  |
| Number of Sig<br>Cluster                | 7      | 1      | 2      | 3      |
| Total pop Sig Cluster                   | 474    | 510    | 359    | 368    |
| % conformers in<br>significant clusters | 48.07% | 52.09% | 37.20% | 37.06% |

pop: Population; SD: Standrad deviation; Sig cluster: Significant clusters

**Table S2.** Primers used in this study.

| No | GTR1 version | vector   | Fragment | Primer direction | Primer sequence                              |
|----|--------------|----------|----------|------------------|----------------------------------------------|
| 1  | GTR1_R196K   | pNB1u    | 1        | Forward          | GGCTTAA <u>U</u> ATGAAGAGCAGAGTCATTCTTAACC   |
|    |              |          |          | Reverse          | ACGGT <u>g</u> TGA <u>U</u> ACCACCAGCG       |
|    |              |          | 2        | Forward          | ATCA <u>a</u> ACCG <u>U</u> GTAATTTAGCGTTTGG |
|    |              |          |          | Reverse          | GGTTTAA <u>U</u> TCAGACAGAGTTCTTGTCTTG       |
| 2  | GTR1_R196Q   | pNB1u    | 1        | Forward          | GGCTTAA <u>U</u> ATGAAGAGCAGAGTCATTCTTAACC   |
|    |              |          |          | Reverse          | ACGGT <u>g</u> GA <u>U</u> ACCACCAGCG        |
|    |              |          | 2        | Forward          | ATC <u>ca</u> ACCG <u>U</u> GTAATTTAGCGTTTGG |
|    |              |          |          | Reverse          | GGTTTAA <u>U</u> TCAGACAGAGTTCTTGTCTTG       |
| 3  | GTR1_R196A   | pNB1uYFP | 1        | Forward          | GGCTTAA <u>U</u> ATGAAGAGCAGAGTCATTCTTAACC   |
|    |              |          |          | Reverse          | ACGGT <u>gc</u> GA <u>U</u> ACCACCAG         |
|    |              |          | 2        | Forward          | ATC <u>gc</u> ACCG <u>U</u> GTAATTTAGCG      |
|    |              |          |          | Reverse          | GGTTTAA <u>U</u> CCGACAGAGTTCTTGTCTTGTAG     |
| 4  | GTR1_E513D   | pNB1uYFP | 1        | Forward          | GGCTTAA <u>U</u> ATGAAGAGCAGAGTCATTCTTAACC   |
|    |              |          |          | Reverse          | AGC <u>a</u> TCTGCTA <u>U</u> GCCTGC         |
|    |              |          | 2        | Forward          | ATAGCAGAtGC <u>U</u> TTTGCTGCC               |
|    |              |          |          | Reverse          | GGTTTAA <u>U</u> CCGACAGAGTTCTTGTCTTGTAG     |
| 5  | GTR1_E513Q   | pNB1uYFP | 1        | Forward          | GGCTTAA <u>U</u> ATGAAGAGCAGAGTCATTCTTAACC   |
|    |              |          |          | Reverse          | AGCTT <u>g</u> TGCTA <u>U</u> GCCTGC         |
|    |              |          | 2        | Forward          | ATAGCA <u>c</u> AAGC <u>U</u> TTTGCTGCC      |
|    |              |          |          | Reverse          | GGTTTAA <u>U</u> CCGACAGAGTTCTTGTCTTGTAG     |
| 6  | GTR1_E513A   | pNB1uYFP | 1        | Forward          | GGCTTAA <u>U</u> ATGAAGAGCAGAGTCATTCTTAACC   |
|    |              |          |          | Reverse          | AGCT <u>g</u> CTGCTA <u>U</u> GCCTGC         |
|    |              |          | 2        | Forward          | ATAGCAG <u>c</u> AGC <u>U</u> TTTGCTGCC      |
|    |              |          |          | Reverse          | GGTTTAA <u>U</u> CCGACAGAGTTCTTGTCTTGTAG     |

Red marks uracil in the primers. Underlined lower case marks the mutation.

**Table S3:** MRM transitions for glucosinolates quantified by LC-MS/MS.

| Analyte                | Retention Time<br>[min] | Q1<br>[m/z] | Q3 [m/z]           | Fragmentor<br>[V] | CE<br>[V] |
|------------------------|-------------------------|-------------|--------------------|-------------------|-----------|
| 2-propenyl (sinigrin)  | 1.72                    | 358.0       | 97.0 <sup>Qt</sup> | 98                | 20        |
| [M-H] <sup>-</sup>     |                         | 358.0       | 259.0              | 98                | 16        |
| Internal standard (IS) |                         | 358.0       | 75.0               | 98                | 36        |
| 4mtb                   | 2.56                    | 420.0       | 97.0 <sup>Qt</sup> | 107               | 24        |
| [M-H] <sup>-</sup>     |                         | 420.0       | 259.0              | 107               | 20        |
|                        |                         | 420.0       | 75.0               | 107               | 40        |
| I3M                    | 2.69                    | 447.0       | 97.0 <sup>Qt</sup> | 112               | 24        |
| [m-H] <sup>-</sup>     |                         | 447.0       | 259.0              | 112               | 24        |
|                        |                         | 447.0       | 205.0              | 112               | 20        |

Qt = quantifier ion, additional transitions were used for identification. Q = quadrupole. CE = collision energy.
